# Supplementary material for: Comparison of epiphytic and intestinal bacterial communities in freshwater snails (Bellamya aeruginosa) living on submerged plants
Source: PeerJ. 2022 Nov 3;10:e14318. doi: 10.7717/peerj.14318 (PMC9637354; doi:10.7717/peerj.14318)
Supplement: Supplemental Information 3 [file peerj-10-14318-s003.xlsx]

## Sheet: Sheet1
Table S1. Water quality assessment for the three sampling dates
date	pH	T	DO	Sal	AN	TN	TP	CODMn
		°C	mg l-1	‰	mg l-1	mg l-1	mg l-1	mg l-1
1	7.66	15.9	4.5	0.64	0.46	2.86	0.13	7.91
2	7.59	13.3	4.2	0.69	1.79	5.5	0.24	7.76
3	7.23	12.3	7.6	0.77	0.16	2.88	0.09	6.86
mean	7.49±0.23	13.8±1.9	5.4±1.9	0.70±0.07	0.80±0.87	3.75±1.52	0.15±0.08	7.51±0.57
Three water samples were collected as the environmental backgrounds. date: sampling date; mean: mean ± standard deviation T: water temperature; DO: dissolved oxygen content; Sal: salinity; AN: ammonia nitrogen; TN: total nitrogen; TP: total phosphorus; CODMn: permanganate index. The water samples was sent to a commercial company (Pony, Shanghai, China) to determine total nitrogen (as the standard…
