# Supplementary material for: Comparison of epiphytic and intestinal bacterial communities in freshwater snails (Bellamya aeruginosa) living on submerged plants
Source: PeerJ. 2022 Nov 3;10:e14318. doi: 10.7717/peerj.14318 (PMC9637354; doi:10.7717/peerj.14318)
Supplement: Supplemental Information 4 [file peerj-10-14318-s004.xlsx]

## Sheet: Sheet1
Table S2. The weight of each sampled snail individual.
intestinal sample	submerged plant	1 (g)	2 (g)	3 (g)	4 (g)	5 (g)	6 (g)
VBM-1	V. natans	1.2	1.1	1.3	1.3	1	1.1
VBM-2	V. natans	1	0.8	1	0.8	0.9	1
VBM-3	V. natans	1.2	1.2	1	1.1	1.1	1.1
CBM-1	C. caroliniana	1.4	1.1	1.3	1.2	1.3	1.3
CBM-2	C. caroliniana	1.2	1	1	0.9	1.8	0.8
CBM-3	C. caroliniana	1.3	0.7	1.1	0.9	0.9	0.7
