# Supplementary material for: Comparison of epiphytic and intestinal bacterial communities in freshwater snails (Bellamya aeruginosa) living on submerged plants
Source: PeerJ. 2022 Nov 3;10:e14318. doi: 10.7717/peerj.14318 (PMC9637354; doi:10.7717/peerj.14318)
Supplement: Supplemental Information 6 [file peerj-10-14318-s006.xlsx]

## Sheet: Sheet1
Table S1. Bacterial alpha diversity indexes for each sample
Sample	sobs	shannon	simpson	ace	chao	coverage
WM_1	496	3.5942	0.07378	908.076	784.164	0.99318
WM_2	463	3.88227	0.04858	622.035	624.803	0.994885
WM_3	548	3.91302	0.048881	938.246	797.613	0.992962
VLM_1	1436	3.5365	0.269653	1999.34	2043.13	0.981318
VLM_2	1760	5.40442	0.020055	2427.59	2336.46	0.978016
VLM_3	1498	4.90409	0.02975	2133.19	2113.1	0.980229
CLM_1	1431	4.42664	0.082049	2104.53	1998.88	0.980193
CLM_2	1396	4.72231	0.035391	2573.29	2095.55	0.979359
CLM_3	1429	4.67839	0.043312	2439.27	2123.41	0.979975
VBM_1	1489	4.9664	0.023017	2152.18	2032.04	0.98012
VBM_2	1230	4.60175	0.033538	2220.14	1823.09	0.982224
VBM_3	1466	5.03079	0.021217	2079.78	2101.93	0.980447
CBM_1	1589	5.41428	0.014438	2064.82	2009.91	0.98237
CBM_2	1265	4.59981	0.028967	2228.41	1793.86	0.981934
CBM_3	1304	4.40346	0.045579	1896.03	1833.29	0.982043
WM, planktonic bacteria; VLM, epiphytic bacteria from V. natans; CLM, epiphytic bacteria from C. caroliniana; VBM, intestinal bacteria in B. aeruginosa from V. natans; CBM, intestinal bacteria in B. aeruginosa from C. caroliniana.
t-test
Estimators	BM-Mean	BM-Sd	WM-Mean	WM-Sd	LM-Mean	LM-Sd	Pvalue(BM-WM)	Qvalue(BM-WM)	Pvalue(BM-LM)	Qvalue(BM-LM)	Pvalue(LM-WM)	Qvalue(LM-WM)
shannon	4.8361	0.3707	3.7965	0.17587	4.6121	0.61982	0.002816	0.00338	0.4649	0.4649	0.0669	0.08028
simpson	0.027793	0.01091	0.05708	0.014463	0.080035	0.095317	0.0108	0.0108	0.2118	0.2866	0.7003	0.7003
ace	2106.9	123.78	822.79	174.51	2279.5	229.91	3.794e-06	7.589e-06	0.1364	0.2728	2.879e-05	4.319e-05
chao	1932.4	130.87	735.53	96.125	2118.4	116.68	2.384e-06	7.151e-06	0.02652	0.07955	4.733e-07	1.42e-06
t-test
Estimators	CLM-Mean	CLM-Sd	VLM-Mean	VLM-Sd	Pvalue	Qvalue
shannon	4.6091	0.15954	4.615	0.96693	0.9922	0.9922
simpson	0.053584	0.024968	0.10649	0.14139	0.5581	0.8371
ace	2372.4	241.44	2186.7	219.08	0.3798	0.7894
chao	2072.6	65.356	2164.2	153.2	0.3947	0.7894
t-test
Estimators	CBM-Mean	CBM-Sd	VBM-Mean	VBM-Sd	Pvalue	Qvalue
shannon	4.8058	0.53598	4.8663	0.23137	0.8664	0.9487
simpson	0.029661	0.015582	0.025924	0.0066551	0.7219	0.9487
ace	2063.1	166.2	2150.7	70.19	0.4476	0.8952
chao	1879	115.06	1985.7	145.08	0.3749	0.8952
