# Supplementary material for: Comparison of epiphytic and intestinal bacterial communities in freshwater snails (Bellamya aeruginosa) living on submerged plants
Source: PeerJ. 2022 Nov 3;10:e14318. doi: 10.7717/peerj.14318 (PMC9637354; doi:10.7717/peerj.14318)
Supplement: Supplemental Information 7 [file peerj-10-14318-s007.xlsx]

## Sheet: Sheet1
Table S2.The top 50 genera shared by epiphytic and intestinal bacterial communities, also see Figure 4.
node name	Genus	totalsequences	BM sequences	LM sequences	BM node degree	LM node degree	Domain	Kingdom	Phylum	Class	Order	Family
node name 1	g__norank_f__Rhizobiales_Incertae_Sedis	28455	11393	17062	2	19	d__Bacteria	k__norank_d__Bacteria	p__Proteobacteria	c__Alphaproteobacteria	o__Rhizobiales	f__Rhizobiales_Incertae_Sedis
node name 2	g__Mycobacterium	21295	13590	7705	2	0	d__Bacteria	k__norank_d__Bacteria	p__Actinobacteriota	c__Actinobacteria	o__Corynebacteriales	f__Mycobacteriaceae
node name 3	g__unclassified_f__Rhodobacteraceae	17423	5744	11679	1	15	d__Bacteria	k__norank_d__Bacteria	p__Proteobacteria	c__Alphaproteobacteria	o__Rhodobacterales	f__Rhodobacteraceae
node name 4	g__unclassified_f__Enterobacteriaceae	15254	900	14354	0	14	d__Bacteria	k__norank_d__Bacteria	p__Proteobacteria	c__Gammaproteobacteria	o__Enterobacterales	f__Enterobacteriaceae
node name 5	g__Methylocystis	11925	8578	3347	3	19	d__Bacteria	k__norank_d__Bacteria	p__Proteobacteria	c__Alphaproteobacteria	o__Rhizobiales	f__Beijerinckiaceae
node name 6	g__norank_f__norank_o__PeM15	9852	7369	2483	15	19	d__Bacteria	k__norank_d__Bacteria	p__Actinobacteriota	c__Actinobacteria	o__PeM15	f__norank_o__PeM15
node name 7	g__Romboutsia	9223	6130	3093	1	18	d__Bacteria	k__norank_d__Bacteria	p__Firmicutes	c__Clostridia	o__Peptostreptococcales-Tissierellales	f__Peptostreptococcaceae
node name 8	g__Exiguobacterium	8591	302	8289	3	9	d__Bacteria	k__norank_d__Bacteria	p__Firmicutes	c__Bacilli	o__Exiguobacterales	f__Exiguobacteraceae
node name 9	g__Clostridium_sensu_stricto_1	7392	4831	2561	16	18	d__Bacteria	k__norank_d__Bacteria	p__Firmicutes	c__Clostridia	o__Clostridiales	f__Clostridiaceae
node name 10	g__Arenimonas	7127	4103	3024	2	10	d__Bacteria	k__norank_d__Bacteria	p__Proteobacteria	c__Gammaproteobacteria	o__Xanthomonadales	f__Xanthomonadaceae
node name 11	g__Aeromonas	6855	6704	151	12	11	d__Bacteria	k__norank_d__Bacteria	p__Proteobacteria	c__Gammaproteobacteria	o__Aeromonadales	f__Aeromonadaceae
node name 12	g__Acinetobacter	6334	79	6255	4	0	d__Bacteria	k__norank_d__Bacteria	p__Proteobacteria	c__Gammaproteobacteria	o__Pseudomonadales	f__Moraxellaceae
node name 13	g__norank_f__Mycoplasmataceae	5409	5403	6	4	2	d__Bacteria	k__norank_d__Bacteria	p__Firmicutes	c__Bacilli	o__Mycoplasmatales	f__Mycoplasmataceae
node name 14	g__norank_f__Propionibacteriaceae	4862	3539	1323	10	20	d__Bacteria	k__norank_d__Bacteria	p__Actinobacteriota	c__Actinobacteria	o__Propionibacteriales	f__Propionibacteriaceae
node name 15	g__Bacillus	4229	1900	2329	16	6	d__Bacteria	k__norank_d__Bacteria	p__Firmicutes	c__Bacilli	o__Bacillales	f__Bacillaceae
node name 16	g__Methyloparacoccus	3755	2870	885	6	18	d__Bacteria	k__norank_d__Bacteria	p__Proteobacteria	c__Gammaproteobacteria	o__Methylococcales	f__Methylococcaceae
node name 17	g__Flavobacterium	3638	2771	867	5	13	d__Bacteria	k__norank_d__Bacteria	p__Bacteroidota	c__Bacteroidia	o__Flavobacteriales	f__Flavobacteriaceae
node name 18	g__Dechloromonas	3412	2703	709	4	2	d__Bacteria	k__norank_d__Bacteria	p__Proteobacteria	c__Gammaproteobacteria	o__Burkholderiales	f__Rhodocyclaceae
node name 19	g__Allorhizobium-Neorhizobium-Pararhizobium-Rhizobium	3361	132	3229	3	2	d__Bacteria	k__norank_d__Bacteria	p__Proteobacteria	c__Alphaproteobacteria	o__Rhizobiales	f__Rhizobiaceae
node name 20	g__norank_f__Steroidobacteraceae	3289	2699	590	10	10	d__Bacteria	k__norank_d__Bacteria	p__Proteobacteria	c__Gammaproteobacteria	o__Steroidobacterales	f__Steroidobacteraceae
node name 21	g__unclassified_c__Gammaproteobacteria	3221	2752	469	3	2	d__Bacteria	k__norank_d__Bacteria	p__Proteobacteria	c__Gammaproteobacteria	o__unclassified_c__Gammaproteobacteria	f__unclassified_c__Gammaproteobacteria
node name 22	g__Chryseobacterium	2863	1	2862	0	7	d__Bacteria	k__norank_d__Bacteria	p__Bacteroidota	c__Bacteroidia	o__Flavobacteriales	f__Weeksellaceae
node name 23	g__Sphingorhabdus	2626	16	2610	3	0	d__Bacteria	k__norank_d__Bacteria	p__Proteobacteria	c__Alphaproteobacteria	o__Sphingomonadales	f__Sphingomonadaceae
node name 24	g__norank_f__norank_o__Gaiellales	2403	1435	968	15	20	d__Bacteria	k__norank_d__Bacteria	p__Actinobacteriota	c__Thermoleophilia	o__Gaiellales	f__norank_o__Gaiellales
node name 25	g__Polynucleobacter	2349	2216	133	15	10	d__Bacteria	k__norank_d__Bacteria	p__Proteobacteria	c__Gammaproteobacteria	o__Burkholderiales	f__Burkholderiaceae
node name 26	g__Novosphingobium	2298	21	2277	2	0	d__Bacteria	k__norank_d__Bacteria	p__Proteobacteria	c__Alphaproteobacteria	o__Sphingomonadales	f__Sphingomonadaceae
node name 27	g__norank_f__norank_o__norank_c__KD4-96	2223	1597	626	15	3	d__Bacteria	k__norank_d__Bacteria	p__Chloroflexi	c__KD4-96	o__norank_c__KD4-96	f__norank_o__norank_c__KD4-96
node name 28	g__Pseudomonas	2188	561	1627	12	12	d__Bacteria	k__norank_d__Bacteria	p__Proteobacteria	c__Gammaproteobacteria	o__Pseudomonadales	f__Pseudomonadaceae
node name 29	g__unclassified_c__Bacilli	2088	2074	14	2	2	d__Bacteria	k__norank_d__Bacteria	p__Firmicutes	c__Bacilli	o__unclassified_c__Bacilli	f__unclassified_c__Bacilli
node name 30	g__CL500-29_marine_group	2007	627	1380	2	20	d__Bacteria	k__norank_d__Bacteria	p__Actinobacteriota	c__Acidimicrobiia	o__Microtrichales	f__Ilumatobacteraceae
node name 31	g__Bifidobacterium	1934	1656	278	3	10	d__Bacteria	k__norank_d__Bacteria	p__Actinobacteriota	c__Actinobacteria	o__Bifidobacteriales	f__Bifidobacteriaceae
node name 32	g__Hyphomicrobium	1887	444	1443	6	1	d__Bacteria	k__norank_d__Bacteria	p__Proteobacteria	c__Alphaproteobacteria	o__Rhizobiales	f__Hyphomicrobiaceae
node name 33	g__Legionella	1857	1202	655	2	22	d__Bacteria	k__norank_d__Bacteria	p__Proteobacteria	c__Gammaproteobacteria	o__Legionellales	f__Legionellaceae
node name 34	g__Luteolibacter	1845	1048	797	1	12	d__Bacteria	k__norank_d__Bacteria	p__Verrucomicrobiota	c__Verrucomicrobiae	o__Verrucomicrobiales	f__Rubritaleaceae
node name 35	g__norank_f__Caldilineaceae	1720	1027	693	13	1	d__Bacteria	k__norank_d__Bacteria	p__Chloroflexi	c__Anaerolineae	o__Caldilineales	f__Caldilineaceae
node name 36	g__norank_f__SC-I-84	1703	1191	512	15	1	d__Bacteria	k__norank_d__Bacteria	p__Proteobacteria	c__Gammaproteobacteria	o__Burkholderiales	f__SC-I-84
node name 37	g__Pseudorhodobacter	1692	230	1462	3	5	d__Bacteria	k__norank_d__Bacteria	p__Proteobacteria	c__Alphaproteobacteria	o__Rhodobacterales	f__Rhodobacteraceae
node name 38	g__Porphyrobacter	1663	2	1661	2	3	d__Bacteria	k__norank_d__Bacteria	p__Proteobacteria	c__Alphaproteobacteria	o__Sphingomonadales	f__Sphingomonadaceae
node name 39	g__norank_f__norank_o__Saccharimonadales	1620	505	1115	3	1	d__Bacteria	k__norank_d__Bacteria	p__Patescibacteria	c__Saccharimonadia	o__Saccharimonadales	f__norank_o__Saccharimonadales
node name 40	g__Arcobacter	1465	1459	6	14	7	d__Bacteria	k__norank_d__Bacteria	p__Campilobacterota	c__Campylobacteria	o__Campylobacterales	f__Arcobacteraceae
node name 41	g__unclassified_k__norank_d__Bacteria	1391	1164	227	3	0	d__Bacteria	k__norank_d__Bacteria	p__unclassified_k__norank_d__Bacteria	c__unclassified_k__norank_d__Bacteria	o__unclassified_k__norank_d__Bacteria	f__unclassified_k__norank_d__Bacteria
node name 42	g__Trichococcus	1357	76	1281	14	10	d__Bacteria	k__norank_d__Bacteria	p__Firmicutes	c__Bacilli	o__Lactobacillales	f__Carnobacteriaceae
node name 43	g__Pedomicrobium	1277	316	961	0	14	d__Bacteria	k__norank_d__Bacteria	p__Proteobacteria	c__Alphaproteobacteria	o__Rhizobiales	f__Hyphomicrobiaceae
node name 44	g__Turicibacter	1213	836	377	11	19	d__Bacteria	k__norank_d__Bacteria	p__Firmicutes	c__Bacilli	o__Erysipelotrichales	f__Erysipelotrichaceae
node name 45	g__Mycoplasma	1134	1128	6	3	18	d__Bacteria	k__norank_d__Bacteria	p__Firmicutes	c__Bacilli	o__Mycoplasmatales	f__Mycoplasmataceae
node name 46	g__GKS98_freshwater_group	1076	939	137	10	16	d__Bacteria	k__norank_d__Bacteria	p__Proteobacteria	c__Gammaproteobacteria	o__Burkholderiales	f__Alcaligenaceae
node name 47	g__unclassified_c__Actinobacteria	1075	889	186	9	20	d__Bacteria	k__norank_d__Bacteria	p__Actinobacteriota	c__Actinobacteria	o__unclassified_c__Actinobacteria	f__unclassified_c__Actinobacteria
node name 48	g__Sphingomonas	1071	28	1043	1	2	d__Bacteria	k__norank_d__Bacteria	p__Proteobacteria	c__Alphaproteobacteria	o__Sphingomonadales	f__Sphingomonadaceae
node name 49	g__norank_f__norank_o__SZB30	1061	673	388	15	14	d__Bacteria	k__norank_d__Bacteria	p__Proteobacteria	c__Gammaproteobacteria	o__SZB30	f__norank_o__SZB30
node name 50	g__unclassified_o__Rhizobiales	1053	269	784	6	11	d__Bacteria	k__norank_d__Bacteria	p__Proteobacteria	c__Alphaproteobacteria	o__Rhizobiales	f__unclassified_o__Rhizobiales
